# Supplementary material for: A New Patient-Derived Metastatic Glioblastoma Cell Line: Characterisation and Response to Sodium Selenite Anticancer Agent
Source: PubMed Central journal article supplement (PMC6356827; doi:10.3390/cancers11010012), 2018-12-21
Supplement: cancers-11-00012-s001.pdf [file cancers-11-00012-s001.pdf]

# Supplementary Materials: A New Patient-Derived Metastatic Glioblastoma Cell Line: Characterisation and Response to Sodium Selenite Anticancer Agent

Sylvie Berthier, Louis Larrouquère, Pierre Champelovier, Edwige Col, Christine Lefebvre, Cécile Cottet-Rouselle, Josiane Arnaud, Catherine Garrel, François Laporte, Jean Boutonnat, Patrice Faure and Florence Hazane-Puch

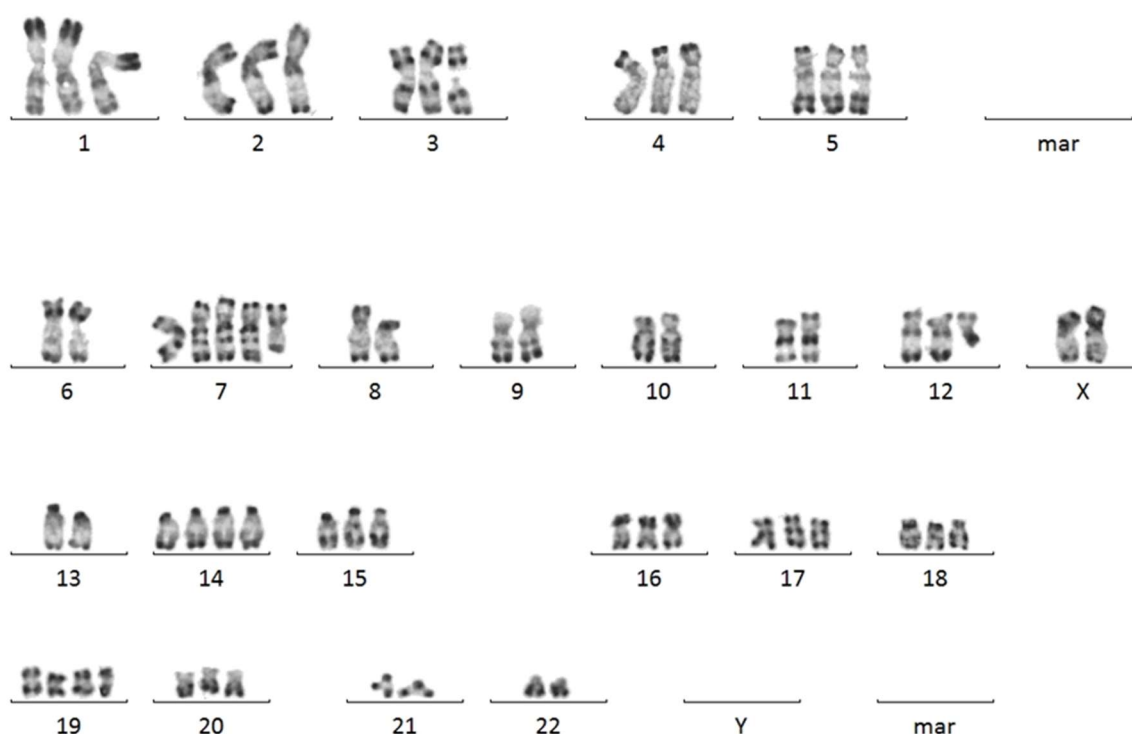

**Figure S1.** A representative G-banded karyotype of R2J cells. The R2J cell line was identified as near-triploid (hypotriploid) with 64 chromosomes.

**Table S1.** primer sequences used for RT-q-PCR.

| Name       | Forward (5'-3')           | Reverse (5'-3')           | Product Size (pb) |
|------------|---------------------------|---------------------------|-------------------|
| E-Cadherin | ATTTTCCCTCGACACCCGAT      | TCCCAGGCGTAGACCAAGA       | 109               |
| HPRT1      | CTCATGGACTAATTATGGACAGGAC | GCAGGTCAGCAAAGAATTTATAGCC | 123               |
| MGMT       | ACCGTTTGGCGACTTGGTACTT    | GGAGCTTATTTCGTGCAGACC     | 127               |
| N-Cadherin | TCAGGCTGTGGACATAGAAACC-   | GCTGTAAACGACTCTGGCACT     | 217               |
| RPL27      | TGATGGCACCTCAGATCGC       | AGAGTACCTTGTGGGCATTAGG    | 240               |
| RPL32      | TTAAGCGTAACTGGCGGAAAC     | GAGCGATCTCGGCACAGTAA      | 210               |
| SOX2       | TGGACAGTTACGCGCACAT       | CGAGTAGGACATGCTGTAGGT     | 215               |
